# Supplementary material
Source: MDPI journal article supplement (https://www.mdpi.com/2072-4292/10/10/1662)
Supplement: s1 [file s1]

## Sheet: Feuil1
	Anse site - Pleiades imagery
	Classification name		Summer-alone				Summer-Spring				Summer-fall				Summer-all-dates				Fall-alone				Fall-Spring				Fall-Summer				Fall-all-dates
			Crisp	Buffer 1m	Buffer 5m		Crisp	Buffer 1m	Buffer 5m		Crisp	Buffer 1m	Buffer 5m		Crisp	Buffer 1m	Buffer 5m		Crisp	Buffer 1m	Buffer 5m		Crisp	Buffer 1m	Buffer 5m		Crisp	Buffer 1m	Buffer 5m		Crisp	Buffer 1m	Buffer 5m
	Knotweed	PA	59	75	88		55	71	86		58	74	87		56	72	87		50	64	81		50	64	80		61	77	90		58	74	88
		UA	28	-	-		28	-	-		31	-	-		35	-	-		25	-	-		25	-	-		34	-	-		33	-	-
	Cut knotweed	PA	22	43	83		34	54	82		27	46	79		43	57	82		39	51	71		45	55	74		44	53	65		44	56	75
		UA	29	-	-		44	-	-		49	-	-		32	-	-		90	-	-		68	-	-		74	-	-		75	-	-
	a) Anse site - UAV imagery
	Classification name		Spring-alone				Spring-phenology				Spring-CHM				Spring-biCHM				Spring-all-dates				Fall-alone				Fall-phenology				Fall-CHM				Fall-biCHM				Fall-all-dates
	Type of boundary		Crisp	Buffer 16cm	Buffer 80cm		Crisp	Buffer 16cm	Buffer 80cm		Crisp	Buffer 16cm	Buffer 80cm		Crisp	Buffer 16cm	Buffer 80cm		Crisp	Buffer 16cm	Buffer 80cm		Crisp	Buffer 16cm	Buffer 80cm		Crisp	Buffer 16cm	Buffer 80cm		Crisp	Buffer 16cm	Buffer 80cm		Crisp	Buffer 16cm	Buffer 80cm		Crisp	Buffer 16cm	Buffer 80cm
	Knotweed	PA	49	62	84		57	70	84		68	81	89		72	84	95		69	82	93		46	69	92		50	68	88		68	80	93		49	79	99		69	81	94
		UA	56	-	-		47	-	-		48	-	-		53	-	-		50	-	-		34	-	-		42	-	-		37	-	-		21	-	-		48	-	-
	Cut knotweed	PA	69	78	91		78	85	97		77	86	96		83	90	97		86	92	98		46	74	91		73	85	95		74	87	94		73	84	96		80	90	97
		UA	39	-	-		58	-	-		50	-	-		46	-	-		47	-	-		34	-	-		69	-	-		56	-	-		59	-	-		64	-	-
	Island knotweed	PA	-	-	-		-	-	-		-	-	-		-	-	-		-	-	-		9	21	57		14	31	79		41	69	95		48	75	97		46	71	98
		UA	-	-	-		-	-	-		-	-	-		-	-	-		-	-	-		8	-	-		14	-	-		10	-	-		4	-	-		14	-	-
	b) Serrières site - UAV imagery
	Classification name		Spring-alone				Spring-phenology				Spring-CHM				Spring-biCHM				Spring-all-dates
	Type of boundary		Crisp	Buffer 16cm	Buffer 80cm		Crisp	Buffer 16cm	Buffer 80cm		Crisp	Buffer 16cm	Buffer 80cm		Crisp	Buffer 16cm	Buffer 80cm		Crisp	Buffer 16cm	Buffer 80cm
	Knotweed	PA	82	91	98		81	90	98		84	92	99		83	91	98		86	93	99
		UA	48	-	-		51	-	-		72	-	-		80	-	-		78	-	-
	Cut knotweed	PA	28	48	76		42	60	77		24	38	61		25	40	63		26	38	59
		UA	25	-	-		22	-	-		47	-	-		35	-	-		75	-	-
